# Supplementary material for: Naphthalimide-Piperazine Derivatives as Multifunctional “On” and “Off” Fluorescent Switches for pH, Hg2+ and Cu2+ Ions
Source: MDPI journal article supplement (doi:10.3390/molecules28031275), 2023-01-28
Supplement: s1 [file s1]

## Supplementary Materials

### Naphthalimide-piperazine derivatives as multifunctional “on” and “off” fluorescent switches for pH, Hg<sup>2+</sup> and Cu<sup>2+</sup> ions

Kristina Pršir <sup>1</sup>, Mislav Matić <sup>1</sup>, Marlena Grbić <sup>1</sup>, Gerhard J. Mohr <sup>2</sup>, Svjetlana Krištafor <sup>1</sup>  
and Ivana Murković Steinberg <sup>1,\*</sup>

<sup>1</sup> Department of General and Inorganic Chemistry, Faculty of Chemical Engineering and Technology, University of Zagreb, Marulićev trg 19, 10000 Zagreb, Croatia; kbobanov@fkit.hr (K.P.); mmatic@fkit.hr (M.M); marlena.grbic@iqvia.com (M.G.); prekupec@fkit.hr (S.K.)

<sup>2</sup> Joanneum Research Forschungsgesellschaft mbH – Materials, Franz-Pichler-Straße 30, Weiz A-8160, Austria; gerhard.mohr@joanneum.at (G.J.M.)

\* Correspondence: imurkov@fkit.hr (I.M.S.)

**Figure S1.** Absorbance spectra of: a) **NI-1** and c) **NI-2** in a buffer/methanol mixture (2:1) at different pH; plot of absorbance ratio at 388 nm and 410 nm vs. pH for: b) **NI-1** and d) **NI-2**.

**Figure S2.** a) Fluorescence spectra of **NI-2** in buffer methanol mixture (2:1) at different pH; b) fluorescence intensity at 525 nm vs. pH.

**Figure S3.** **NI-1** in the presence of metal ions (from left: blank, Zn<sup>2+</sup>, Fe<sup>2+</sup>, Fe<sup>3+</sup>, Cu<sup>2+</sup>, Al<sup>3+</sup>, Hg<sup>2+</sup>, Pb<sup>2+</sup>, Co<sup>2+</sup>, Ni<sup>2+</sup>, Ag<sup>+</sup>, Mn<sup>2+</sup>, Ba<sup>2+</sup>, Cd<sup>2+</sup>, Mg<sup>2+</sup>, Ca<sup>2+</sup>) *c* (metal ion) = 3.0 × 10<sup>-5</sup> M.

**Figure S4.** UV-Vis spectra of **NI-1** solution upon the addition of 20 equiv. of a) Hg(II) and b) Cu(II) ions.

**Figure S5.** Changes in the emission spectra of **NI-1** upon gradual addition of Cu<sup>2+</sup> and EDTA.

**Figure S6.** Changes in the emission spectra of **NI-1** upon gradual addition of Hg<sup>2+</sup> and EDTA.

**Figure S7.** Benesi-Hildebrand's plot in linear range for **NI-1** binding with a) Cu<sup>2+</sup> b) Hg<sup>2+</sup>.

**Figure S8.** Dependence of fluorescence intensity of **NI-1** ( $5.00 \times 10^{-7}$  M) in MeOH / buffer pH 5.5 (v / v, 1/2) at 523 nm on the ion concentration in the linear range of dependence for a)  $\text{Cu}^{2+}$  b)  $\text{Hg}^{2+}$  ion.

**Figure S9.** Stern-Volmer plot of the ratio of the fluorescence intensities ( $F_0/F$ ) of **NI-1** against the increasing concentration of a)  $\text{Cu}^{2+}$  and b)  $\text{Hg}^{2+}$  ions in linear range.

**Figure S10.** UV-Vis spectra of **NI-2** upon the addition of Hg(II) ions.

**Figure S11.** Job's plot fluorescence intensity at 525 nm on the molar content of **NI-2** in presence of  $\text{Hg}^{2+}$  ions at a total concentration of  $5.00 \times 10^{-6}$  M. The extrapolated directions of intensity dependence on the molar fraction of **NI-2** are presented.

**Figure S12.** Benesi-Hildebrand's plot in linear range for **NI-2** binding with  $\text{Hg}^{2+}$ .

**Figure S13.** Dependence of fluorescence intensity of **NI-2** ( $6.53 \times 10^{-6}$  M) in MeOH / buffer 5.5 (v/v, 1/2) at 525 nm on the ion concentration in the linear range of dependence for  $\text{Hg}^{2+}$  ion.

**Figure S14.** Reversibility test for **NI-2** and Hg(II) binding.

a)

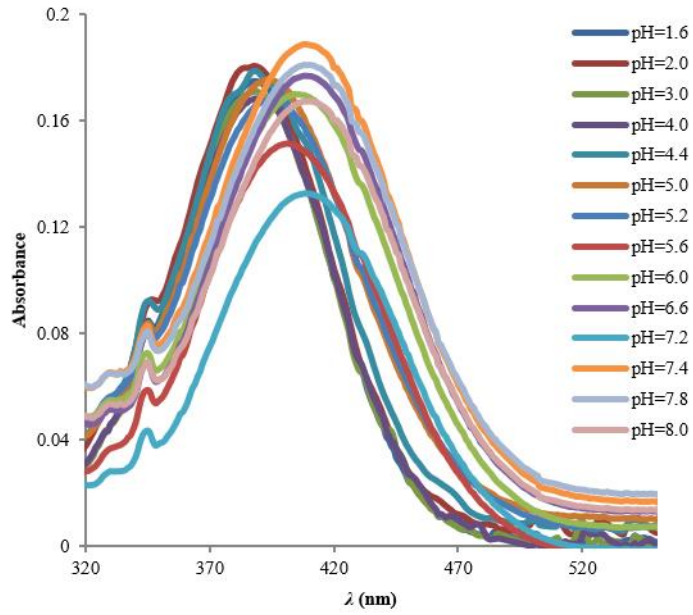

b)

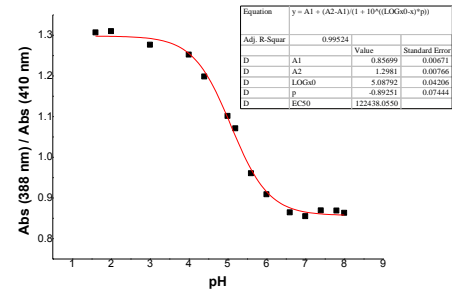

c)

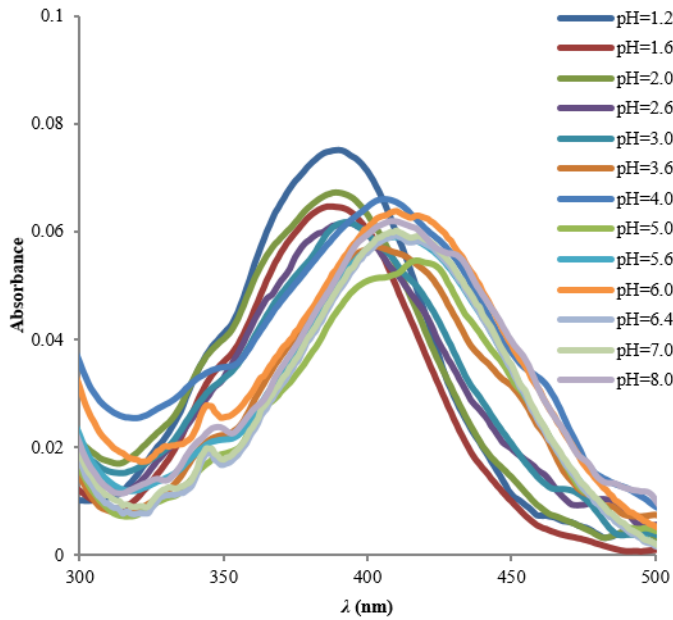

d)

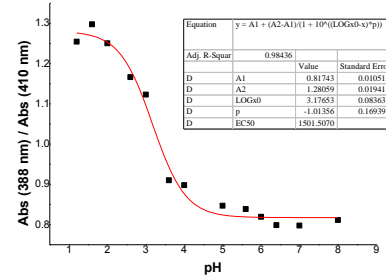

**Figure S1.** Absorbance spectra of: a) **NI-1** and c) **NI-2** in a buffer/methanol mixture (2:1) at different pH; plot of absorbance ratio at 388 nm and 410 nm vs. pH for: b) **NI-1** and d) **NI-2**. The spectra of compounds **NI-1** and **NI-2** were recorded in MeOH/buffer (1:2) at compound concentrations  $6.56 \times 10^{-5}$  M and  $6.54 \times 10^{-5}$  M, respectively.

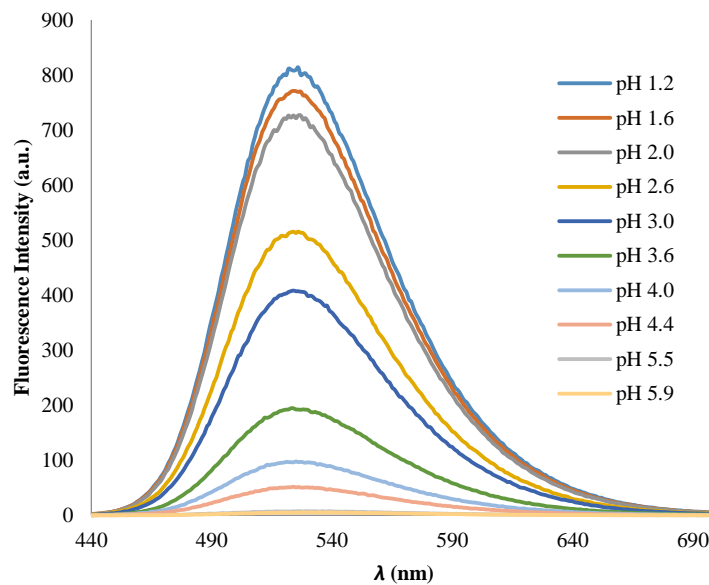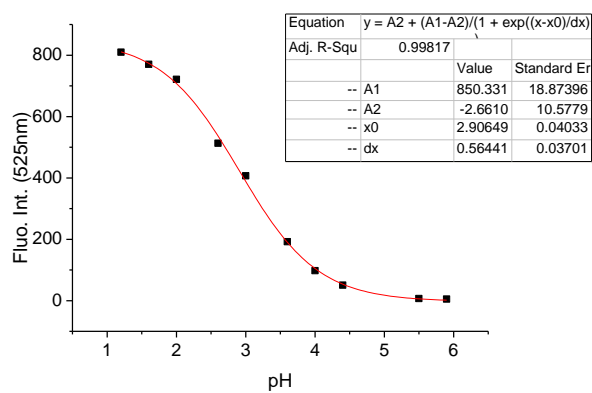

**Figure S2.** a) Fluorescence spectra of **NI-2** in buffer methanol mixture (2:1) at different pH; b) fluorescence intensity at 525 nm vs. pH.

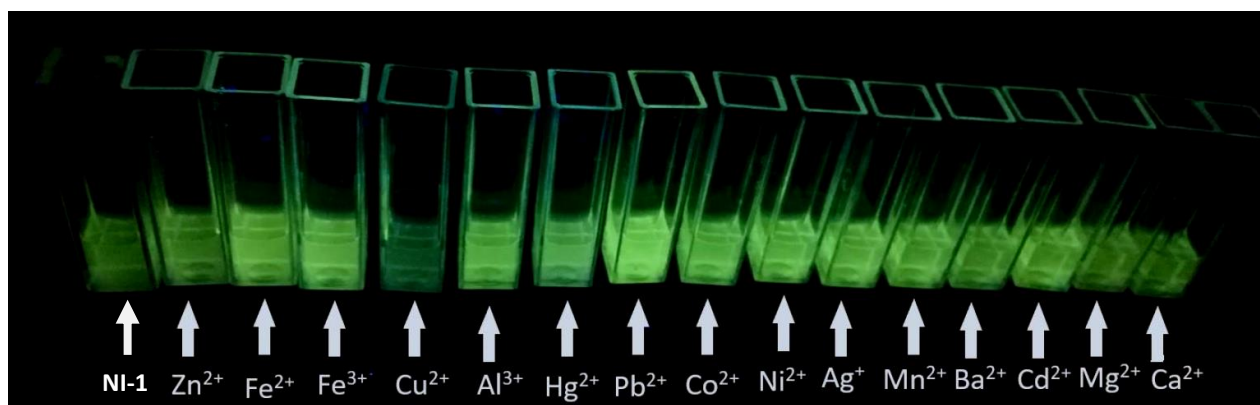

**Figure S3.** NI-1 in the presence of metal ions (from left: blank,  $\text{Zn}^{2+}$ ,  $\text{Fe}^{2+}$ ,  $\text{Fe}^{3+}$ ,  $\text{Cu}^{2+}$ ,  $\text{Al}^{3+}$ ,  $\text{Hg}^{2+}$ ,  $\text{Pb}^{2+}$ ,  $\text{Co}^{2+}$ ,  $\text{Ni}^{2+}$ ,  $\text{Ag}^+$ ,  $\text{Mn}^{2+}$ ,  $\text{Ba}^{2+}$ ,  $\text{Cd}^{2+}$ ,  $\text{Mg}^{2+}$ ,  $\text{Ca}^{2+}$ )  $c(\text{metal ion}) = 3.0 \times 10^{-5} \text{ M}$ .

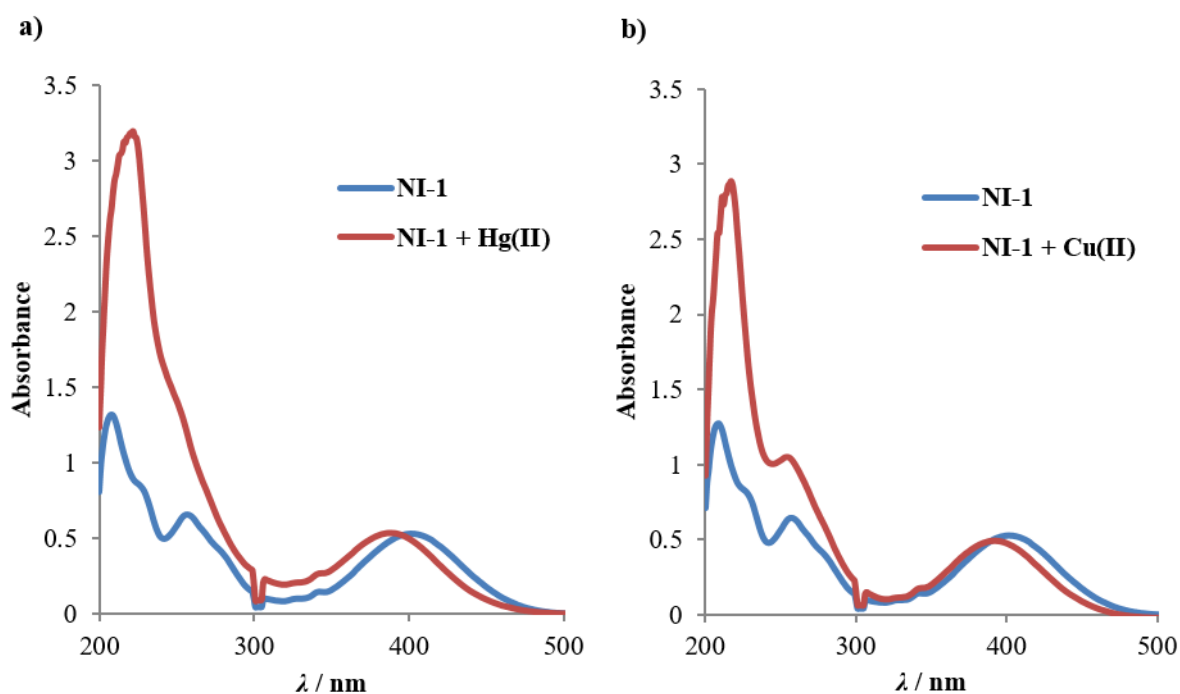

**Figure S4.** UV-Vis spectra of NI-1 solution upon the addition of 20 equiv. of a)  $\text{Hg(II)}$  and b)  $\text{Cu(II)}$  ions.



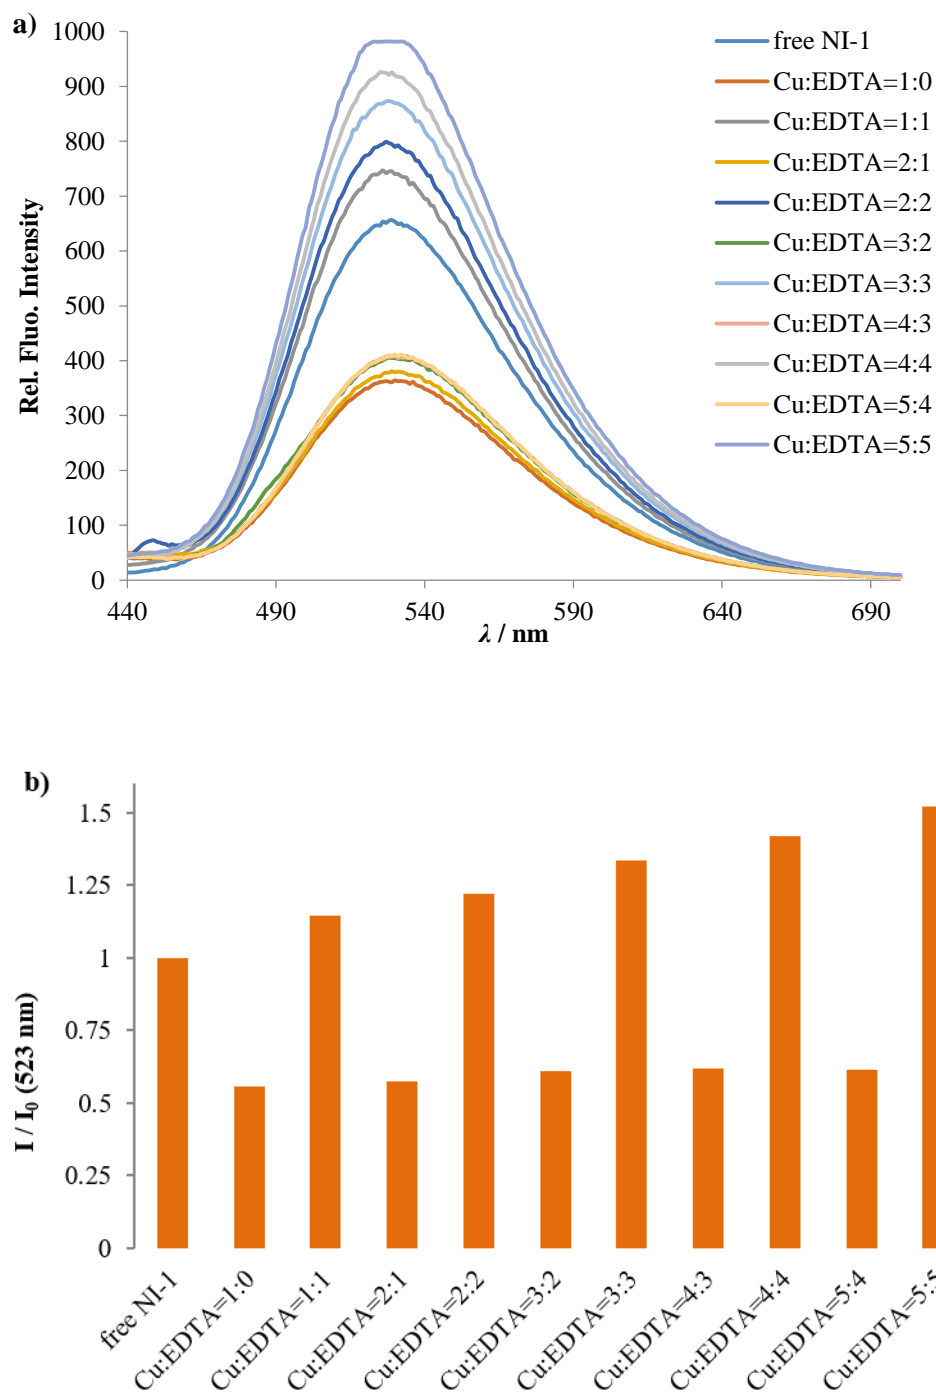

**Figure S5.** Changes in the emission spectra of **NI-1** upon gradual addition of  $\text{Cu}^{2+}$  and EDTA.

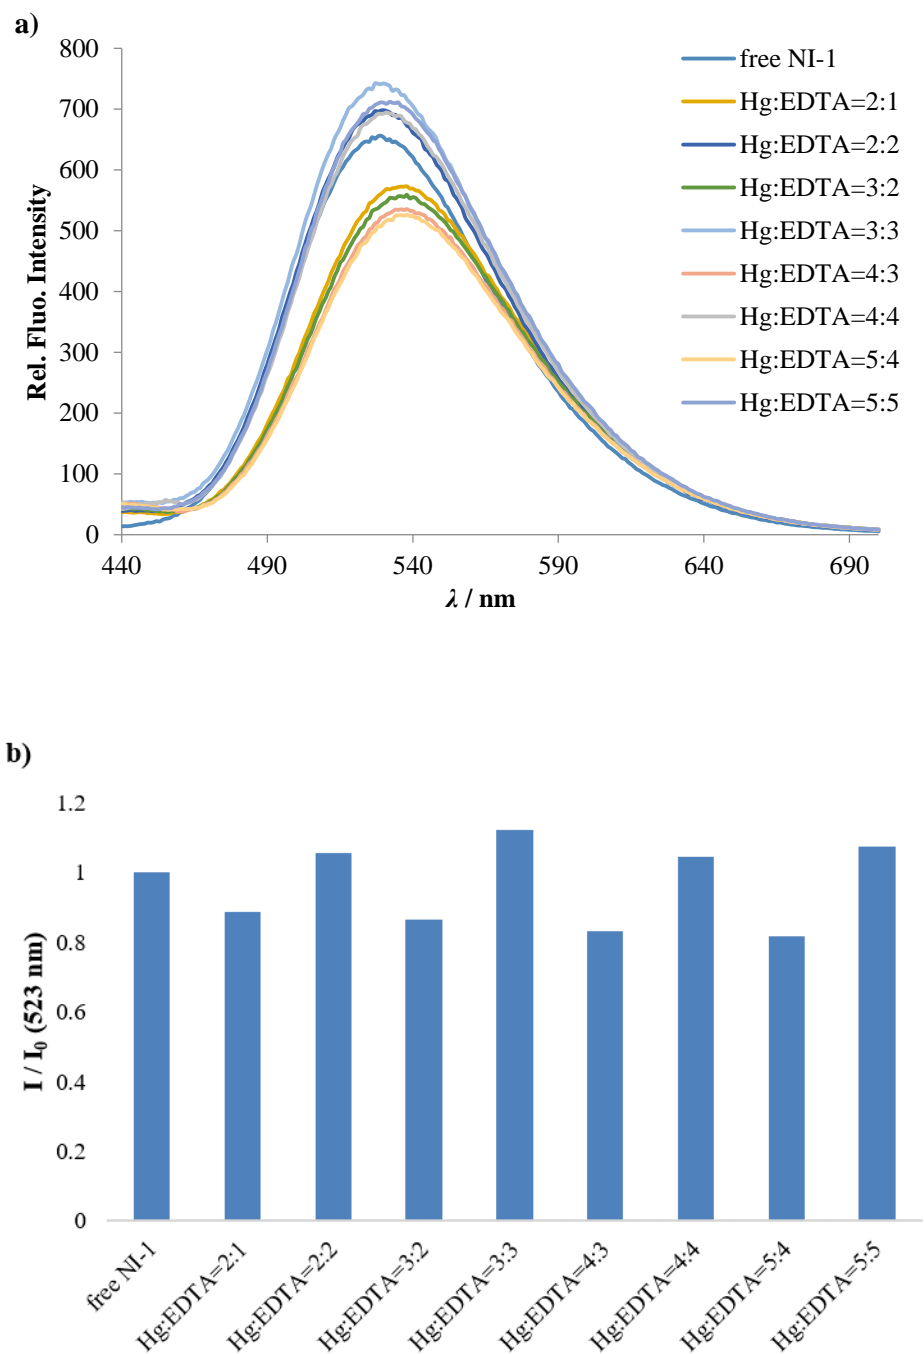

**Figure S6.** Changes in the emission spectra of **NI-1** upon gradual addition of  $\text{Hg}^{2+}$  and EDTA.

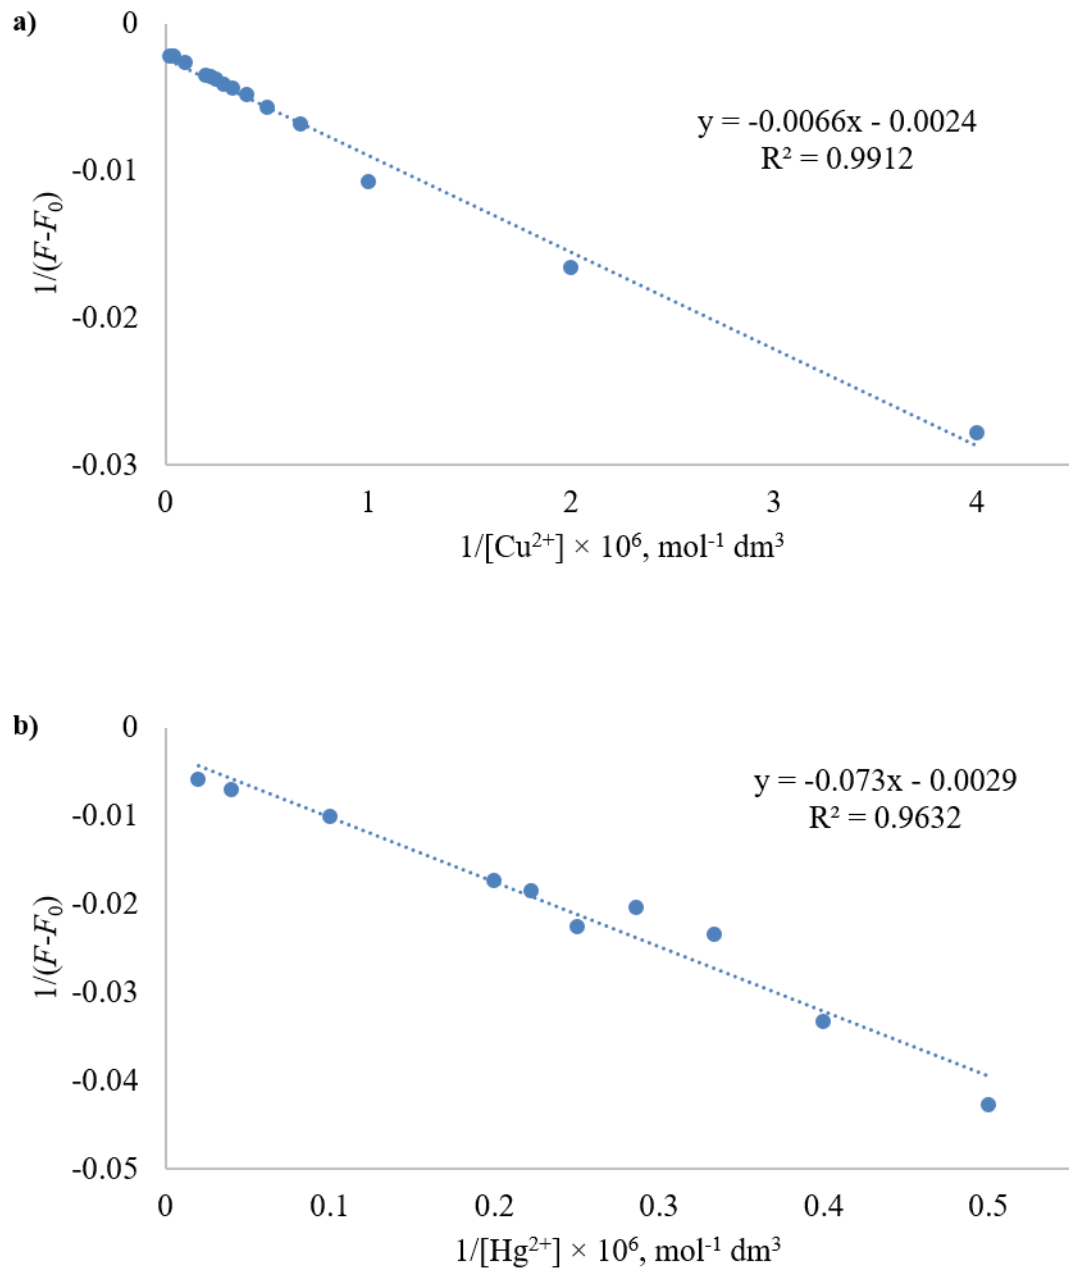

**Figure S7.** Benesi-Hildebrand's plot in linear range for **NI-1** binding with a)  $\text{Cu}^{2+}$  b)  $\text{Hg}^{2+}$ .

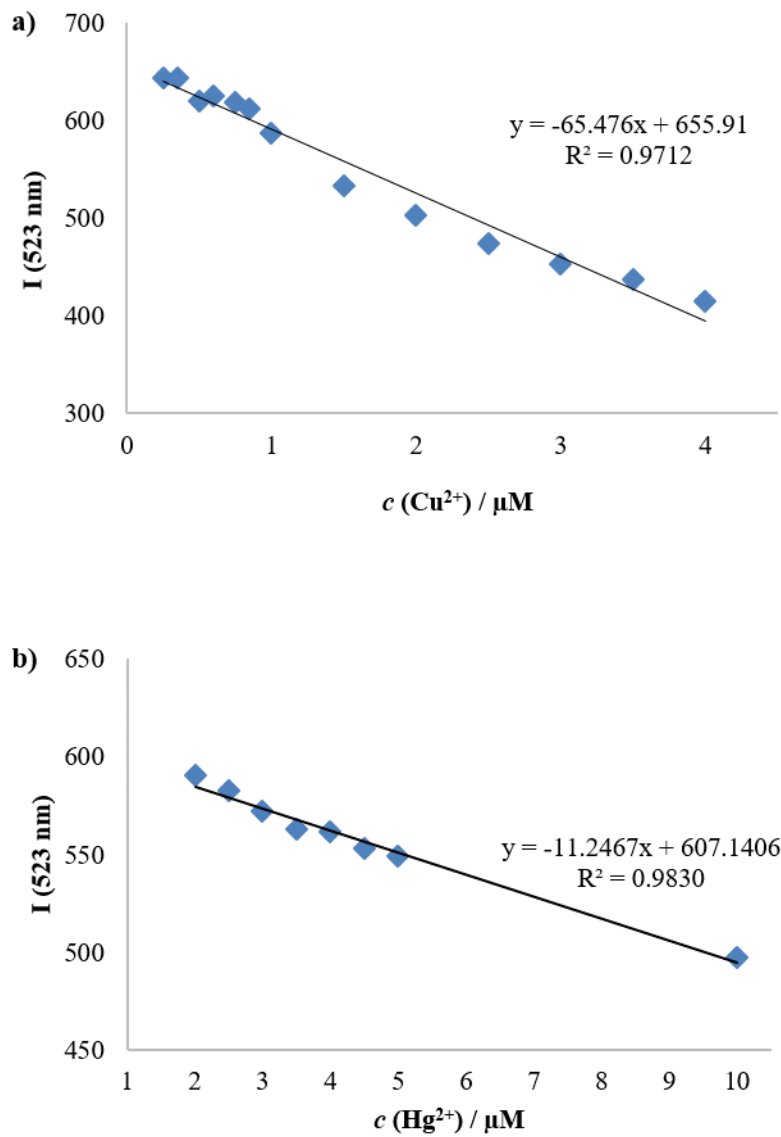

**Figure S8.** Dependence of fluorescence intensity of **NI-1** ( $5.00 \times 10^{-7} \text{ M}$ ) in MeOH / buffer pH 5.5 (v / v, 1/2) at 523 nm on the ion concentration in the linear range of dependence for a)  $\text{Cu}^{2+}$  b)  $\text{Hg}^{2+}$  ion.

Stern-Volmer's equation for **NI-1** was derived using:

$$\frac{F_0}{F} = 1 + K_{sv}[Q]$$

where  $F_0$  - initial fluorescence intensity,  $F$  – fluorescence intensity in the presence of the analyte,  $[Q]$  – concentration of fluorescence quencher ( $\text{Cu}^{2+}$  or  $\text{Hg}^{2+}$  ion),  $K_{sv}$  – Stern-Volmer constant.

The Stern-Volmer constant is equal to the slope in the linear range of the fluorescence intensity ratio of **NI-1** without metal ions and fluorescence intensity in the presence of ions at 523 nm as shown in Fig. S10. For  $\text{Cu}^{2+}$  ion the Stern-Volmer constant is  $152570 \text{ M}^{-1}$ , and for  $\text{Hg}^{2+}$  ion it is  $23909 \text{ M}^{-1}$ .

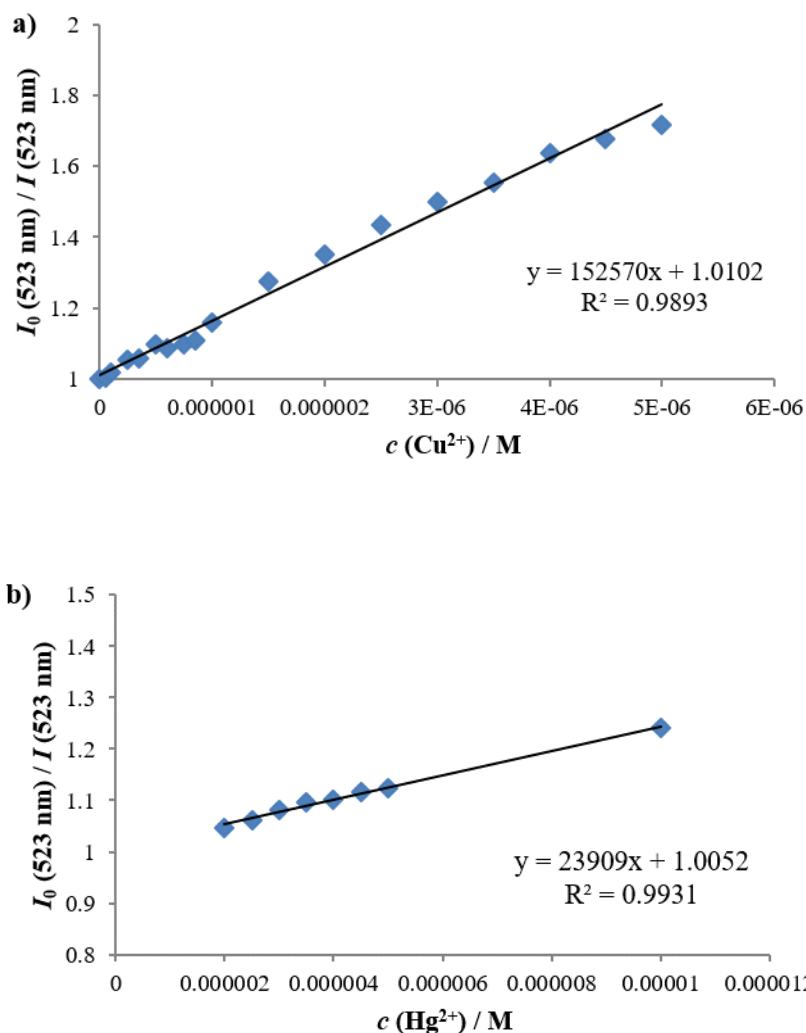

**Figure S9.** Stern-Volmer plot of the ratio of the fluorescence intensities ( $F_0/F$ ) of **NI-1** against the increasing concentration of a)  $\text{Cu}^{2+}$  and b)  $\text{Hg}^{2+}$  ions in linear range.

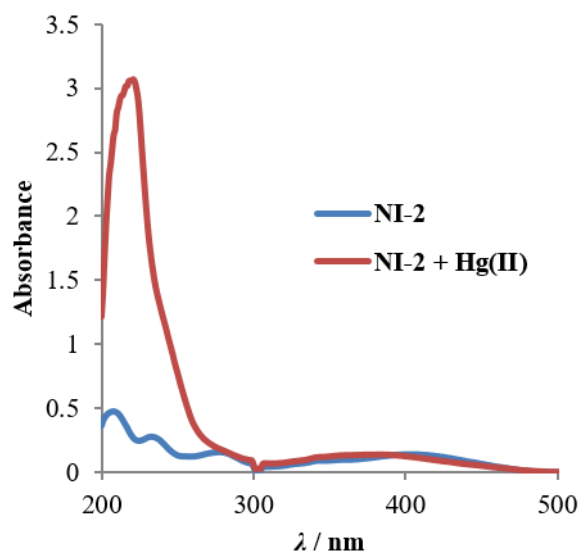

**Figure S10.** UV-Vis spectra of **NI-2** upon the addition of Hg(II) ions.

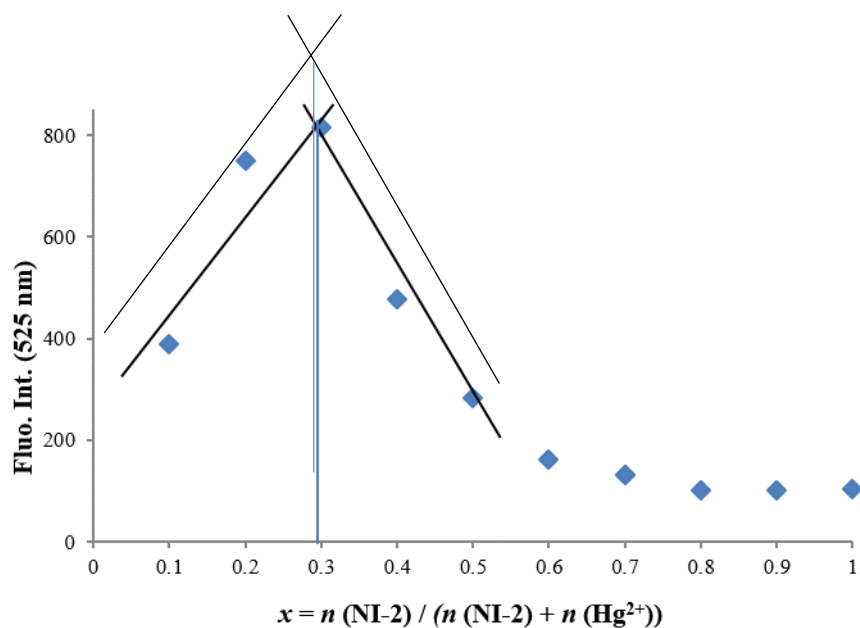

**Figure S11.** Job's plot fluorescence intensity at 525 nm on the molar content of **NI-2** in presence of  $\text{Hg}^{2+}$  ions at a total concentration of  $5.00 \times 10^{-6}$  M. The extrapolated directions of intensity dependence on the molar fraction of **NI-2** are presented.



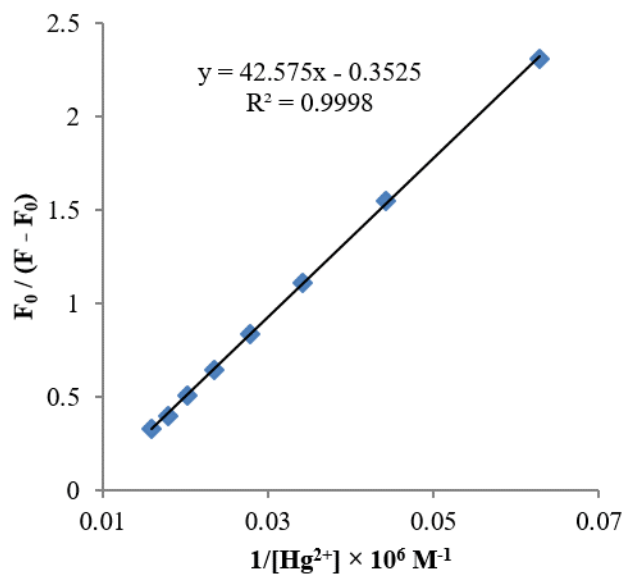

**Figure S12.** Benesi-Hildebrand's plot in linear range for **NI-2** binding with  $Hg^{2+}$ .

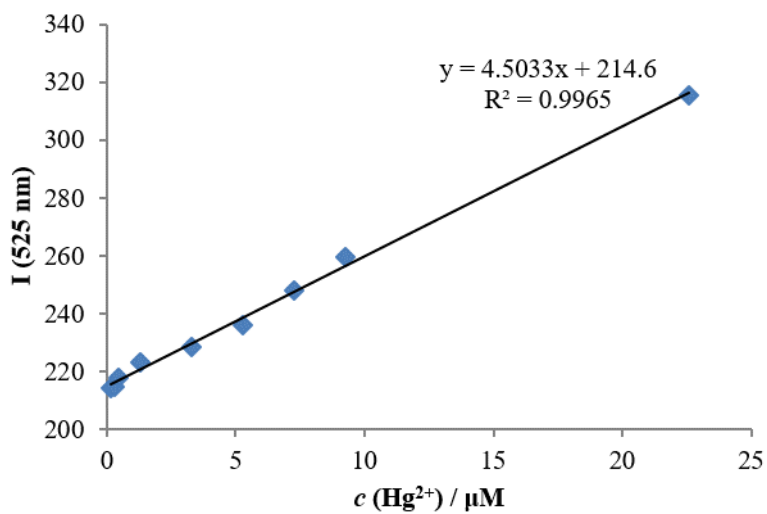

**Figure S13.** Dependence of fluorescence intensity of **NI-2** ( $6.53 \times 10^{-6}$  M) in MeOH / buffer 5.5 (v/v, 1/2) at 525 nm on the ion concentration in the linear range of dependence for  $\text{Hg}^{2+}$  ion.

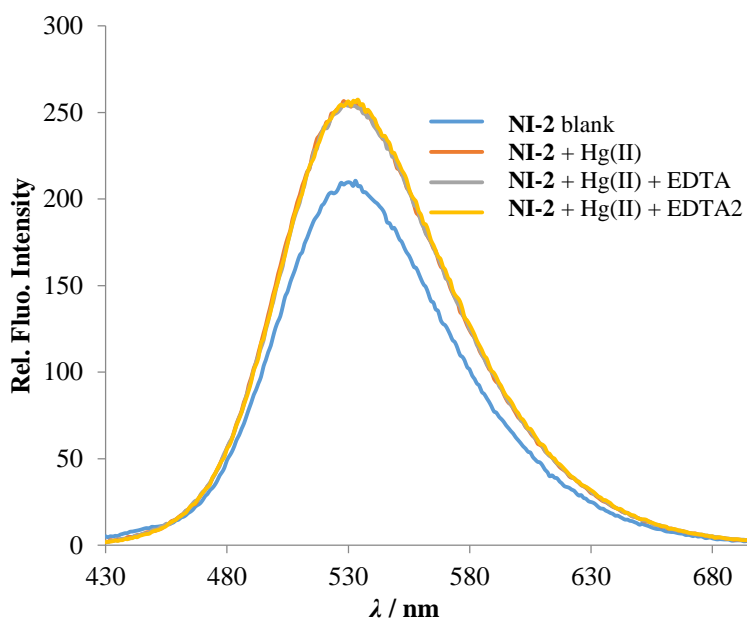

**Figure S14.** Reversibility test for **NI-2** and Hg(II) binding.
